# Supplementary material
Source: PubMed Central journal article supplement (PMC8476856)
Supplement: NIHMS1709404-supplement-3.pdf [file NIHMS1709404-supplement-3.pdf]

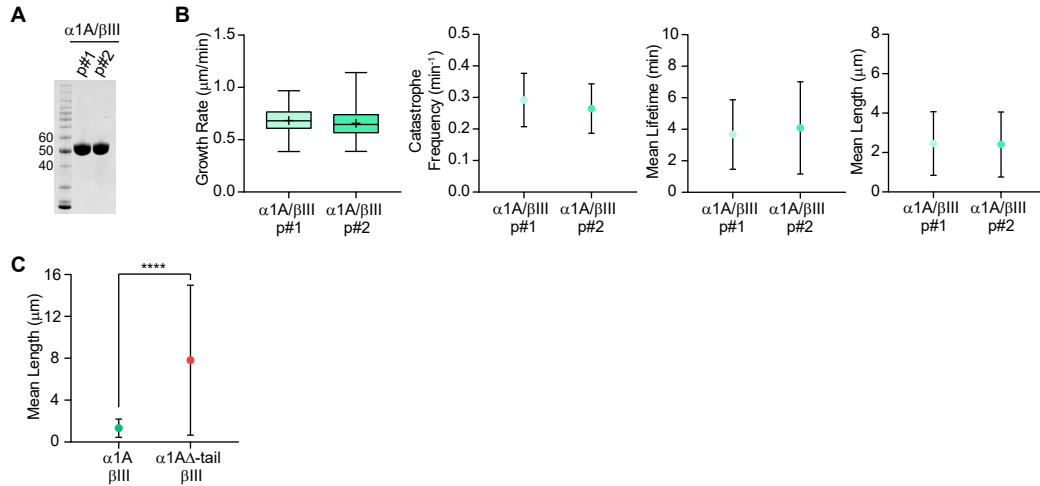

**Figure S1. Dynamic parameters are consistent between different preparations of recombinant human  $\alpha 1 A / \beta III$  tubulin (related to Figures 1 and 3).** (A) SDS-polyacrylamide gel (5  $\mu\text{gs}$ ) of recombinant human  $\alpha 1 A / \beta III$  from two different growths and purifications. (B) Plus-end dynamic parameters of  $\alpha 1 A / \beta III$  microtubules at 6  $\mu\text{M}$  from the two different preparations shown in (A). From left to right: Growth rates in box-whisker plot (whiskers represent minimum to maximum);  $n = 256$  and 95 growth phases for preparation #1 and preparation #2, respectively. Catastrophe frequencies;  $n = 29$  and 12 microtubules for preparation #1 and preparation #2, respectively. Microtubule mean lifetime and mean length;  $n = 256$  and 95 growth phases for preparation #1 and preparation #2, respectively. Error bars represent S.D. (C) Microtubule plus-end mean length at 4  $\mu\text{M}$  tubulin concentration;  $n = 181$  and 424 for  $\alpha 1 A / \beta III$  and  $\alpha 1 A \Delta\text{-tail} / \beta III$ , respectively. Error bars represent S.D.; \*\*\*\* denotes  $p < 0.0001$  as determined by a Mann-Whitney test.

A

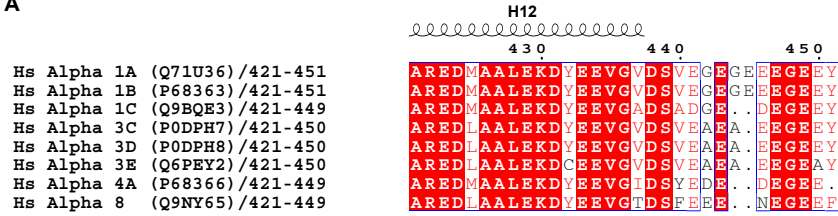

B

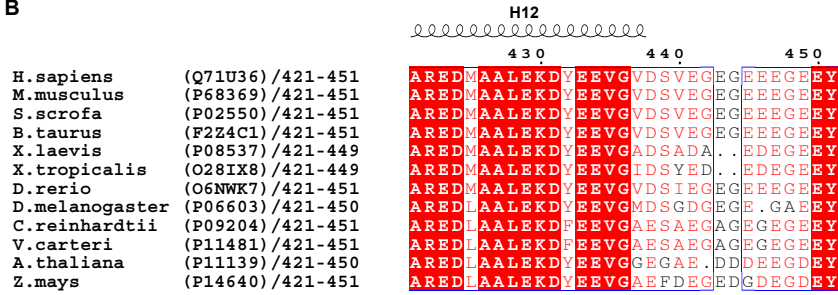

**Figure S2. Sequence alignment of  $\alpha$ -tubulin tails (related to Figures 1 and 3).**

(A) Sequence alignment of the C-termini of eight human  $\alpha$ -tubulin isoforms. Uniprot ID for each sequence indicated in brackets. The length of the H12 helix is based on the cryo-EM structure of human recombinant  $\alpha$ 1A/ $\beta$ III microtubules (PDB ID: 5JCO; (Vemu, et al., 2016)). (B) Sequence alignment of tubulin  $\alpha$ 1A isoforms from various species.

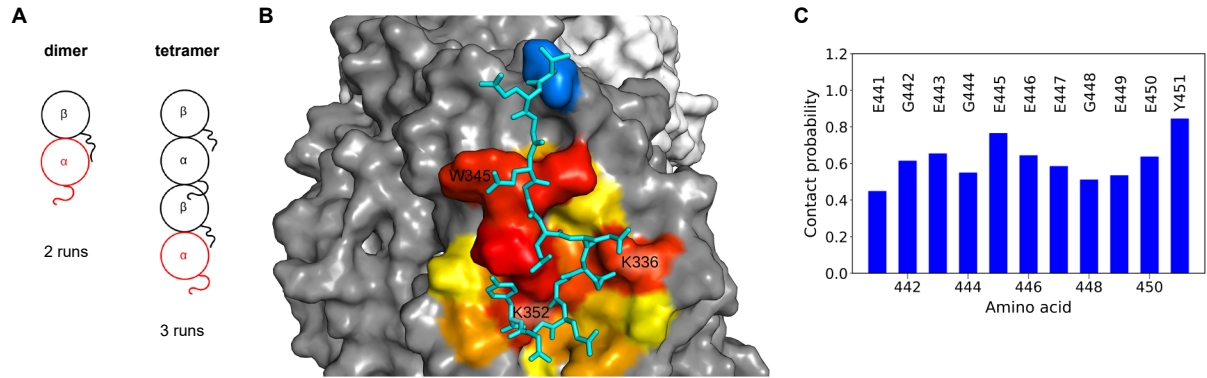

**Figure S3 (related to Figures 2 and 3).**

(A) Schematics of MD models used to examine the interactions between the tail of  $\alpha$ -tubulin and its body. Red outline marks the  $\alpha$ -tubulin subunit used in the analyses. (B) A snapshot of a simulation with a GTP-tubulin dimer, showing the  $\alpha$ -tubulin tail interacting with positively charged residues at the  $\alpha$ -tubulin longitudinal polymerization interface colored on a gradient from yellow to red according to the probability of its contact with the  $\alpha$ -tubulin tail. Residue S439 where the tail originates is shown in blue. (C) Distribution of conditional contact probabilities for residues in the  $\alpha$ -tubulin tail with the longitudinal polymerization interface, provided that at least one residue of the  $\alpha$ -tubulin tail contacts the interface. Calculated from 5 independent one-microsecond-long simulations for GTP-tubulin.

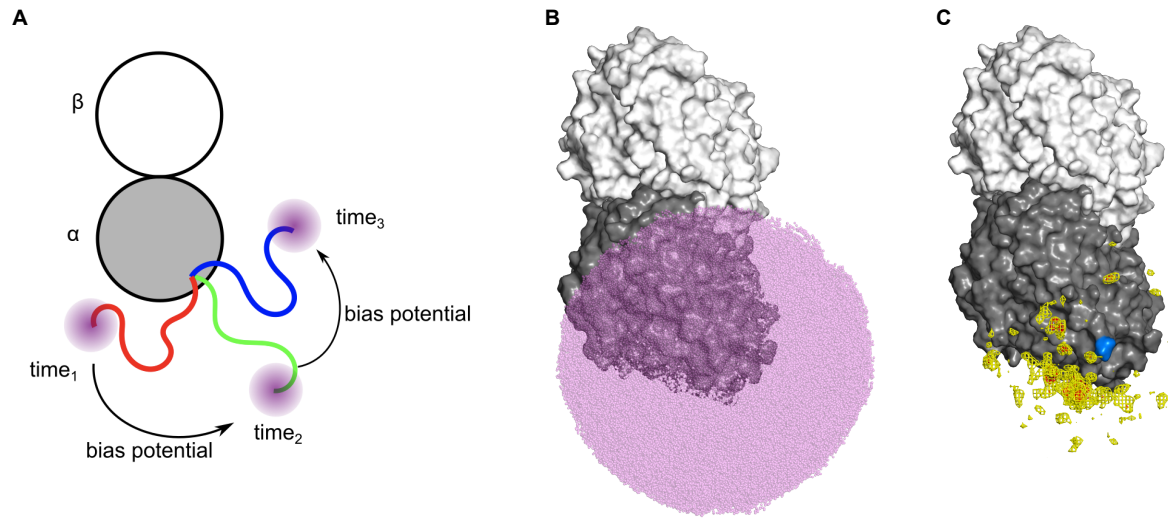

**Figure S4. Metadynamics simulation for enhanced sampling of the  $\alpha$ -tubulin C-terminal tail (related to Figure 2).**

(A) Schematic of the metadynamics simulation. A bias potential (purple) is applied to the tip of the  $\alpha$ -tubulin tail. Three configurations of the tail at three times are schematized. Bias potential accelerates displacement of the tail to enhance sampling of the configuration space. (B) A cloud of bias potentials (purple dots) added throughout the 2  $\mu$ s-long metadynamics simulation. (C) Visualization of the positions where the highest densities of bias potentials were added to steer the C-terminal tip of the  $\alpha$ -tubulin tail. The spatial distribution of these spots illustrates that the tail is predominantly located at the longitudinal polymerization interface. Residue S439 where the tail originates is shown in blue.

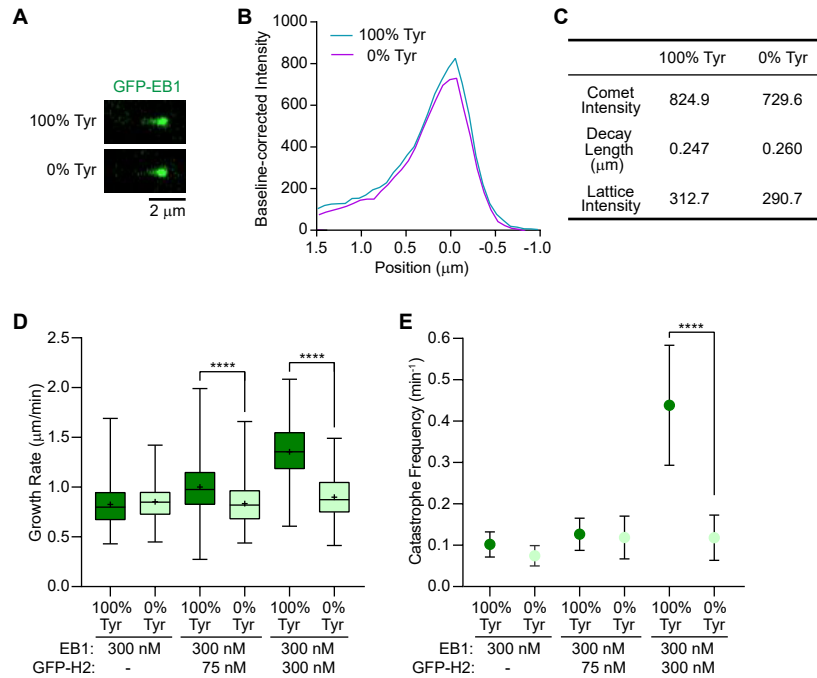

**Figure S5 (related to Figure 4)**

(A) TIRF microscopy images of GFP-EB1 (100 nM, green) on recombinant tyrosinated (100%) and detyrosinated (0%) microtubules. (B) Averaged fluorescence intensity profiles of GFP-EB1 (100 nM) on 15 μM tyrosinated (100%; n=124) or detyrosinated (0%; n=96) microtubules. (C) Comet profiles parameters. Comet profiles were fitted using Gaussian (-1.5 to 0 μm) and single exponential functions (0 to 1.5 μm; STAR Methods). (D, E) Plus-end dynamic parameters of 6 μM tyrosinated (100% Tyr) or detyrosinated (0% Tyr) microtubules in the presence of 300 nM EB1 and 0/75/300 nM GFP-H2. (D) Growth rates; n= 223, 82, 426, 309, 934, and 106 growth phases for 100%Tyr/EB1, 0%Tyr/EB1, 100%Tyr/EB1/H2 (75 nM), 0%Tyr/EB1/H2 (75 nM), 100%Tyr/EB1/H2 (300 nM), and 0%Tyr/EB1/H2 (300 nM), respectively. Whiskers represent minimum and maximum. (E) Catastrophe frequencies; n= 39, 17, 63, 50, 63, and 21 microtubules for 100%Tyr/EB1, 0%Tyr/EB1, 100%Tyr/EB1/H2 (75 nM), 0%Tyr/EB1/H2 (75 nM), 100%Tyr/EB1/H2 (300 nM), and 0%Tyr/EB1/H2 (300 nM), respectively. Error bars represent S.D.

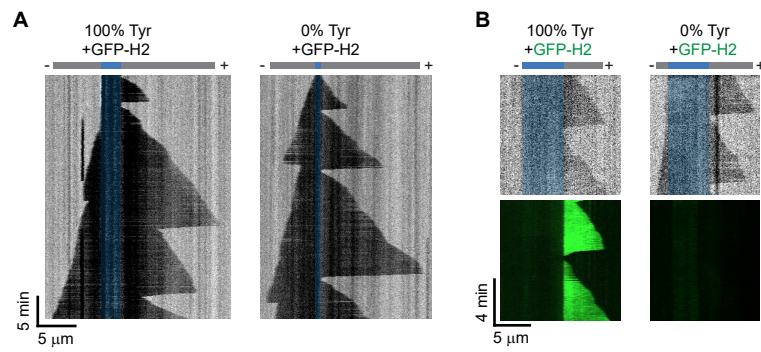

**Figure S6. CLIP-170 preferentially increases the rescue rates of tyrosinated microtubules (related to Figure 4).**  
 (A) Representative IRM kymographs of 6 μM 100% (left) or 0% (right) tyrosinated microtubules with 300 nM GFP-H2. (B) Representative IRM (top) and TIRF microscopy (bottom) kymographs of 6 μM tyrosinated (100% Tyr; left) or detyrosinated (0% Tyr; right) microtubules with 300 nM GFP-H2 (green).
